# Supplementary material
Source: PubMed Central journal article supplement (PMC9295384)
Supplement: mmc1.pdf [file mmc1.pdf]

The LINCOLN Survey: L-Arginine and Vitamin C improves Long-COVID

| FIRST NAME   | LAST NAME     | AFFILIATION                                    |
|--------------|---------------|------------------------------------------------|
| RAFFAELE     | IZZO          | FEDERICO II UNIVERSITY, NAPLES                 |
| VALENTINA    | TRIMARCO      | FEDERICO II UNIVERSITY, NAPLES                 |
| PASQUALE     | MONE          | AECOM, NY, NY                                  |
| TERESITA     | ALOE'         | SAN MARTINO HOSPITAL, GENOA                    |
| MASSIMO      | CAPRA MARZANI | ALESSANDRIA HOSPITAL, ALESSANDRIA              |
| ANTONIO      | DIANA         | AVERSA HOSPITAL, AVERSA                        |
| GIOVANNI     | FAZIO         | PALERMO HOSPITAL, PALERMO                      |
| MARIO        | MALLARDO      | SAN GENNARO HOSPITAL, NAPLES                   |
| MAURO        | MANISCALCO    | IRCCS MAUGERI, TELESE TERME                    |
| GIUSEPPE     | MARAZZI       | SAN RAFFAELE HOSPITAL, ROME                    |
| NUNZIA       | MESSINA       | ASL NA1, NAPLES                                |
| SIMONE       | MININNI       | ASIAM, FLORENCE                                |
| CHIARA       | MUSSI         | UNIVERSITY OF MODENA AND REGGIO EMILIA, MODENA |
| GIROLAMO     | PELAIA        | MAGNA GRAECIA UNIVERSITY, CATANZARO            |
| ALFIO        | PENNISI       | CATANIA HOSPITAL, CATANIA                      |
| PIERACHILLE  | SANTUS        | SACCO UNIVERSITY HOSPITAL, MILAN               |
| FRANCESCO    | SCARPELLI     | TRANI HOSPITAL, TRANI                          |
| GAETANO      | SANTULLI      | FEDERICO II UNIVERSITY, NAPLES – AECOM, NY, NY |
| BRUNO        | TRIMARCO      | FEDERICO II UNIVERSITY, NAPLES                 |
| FRANCESCO    | TURSI         | CODOGNO HOSPITAL, LODI                         |
| ALESSANDRO   | ZANFORLIN     | HEALTH AUTHORITY OF SOUTH TYROL, BOLZANO       |
| MANIJEH      | ABASI         | GENERAL PRACTITIONER, REGGIO EMILIA            |
| MARIA        | ACCETTA       | GENERAL PRACTITIONER, MESSINA                  |
| GIUSEPPE     | ACCINI        | GENERAL PRACTITIONER BRESCIA                   |
| CLARA        | ADIMARI       | GENERAL PRACTITIONER, REGGIO EMILIA            |
| MARIA IDA    | AGOSTINI      | GENERAL PRACTITIONER, RENDE                    |
| MATTEO       | ALBERTINI     | GERONTOLOGIST, ROME                            |
| FRANCESCO    | ALEMANNO      | GENERAL PRACTITIONER, TERRACINA                |
| FABRIZIO     | ALEMANNO      | GENERAL PRACTITIONER, REGGIO EMILIA            |
| MARCO        | ALESSANDRIA   | GENERAL PRACTITIONER MILANO                    |
| CONCETTA     | ALESSANDRO    | GENERAL PRACTITIONER, MESSINA                  |
| ANDREA       | ALMA          | GENERAL PRACTITIONER, ROME                     |
| TIZIANA      | ALTIERI       | GENERAL PRACTITIONER, PALERMO                  |
| SALVATORE    | AMATO         | GENERAL PRACTITIONER, CATANIA                  |
| SALVATORE    | ANDOLFO       | GENERAL PRACTITIONER, CINISELLO BALSAMO        |
| CRISTINA     | ANDREOLI      | GENERAL PRACTITIONER, REGGIO EMILIA            |
| LIA          | ANNUNZIATA    | GENERAL PRACTITIONER, REGGIO EMILIA            |
| ROBERTO      | ARGENTO       | GENERAL PRACTITIONER, CAMPANIA                 |
| PIETRO       | ARNÒ          | GERONTOLOGIST, SASSARI                         |
| LUCIA        | ARPELLINO     | GENERAL PRACTITIONER, GENOVA                   |
| GAETANO      | ARPINO        | GENERAL PRACTITIONER, CAMPANIA                 |
| SHAIKK       | ASHRAF        | GENERAL PRACTITIONER, BRESCIA                  |
| SHAIKK       | ASHRAF        | GENERAL PRACTITIONER, BRESCIA                  |
| MARIA GRAZIE | ASSENTATO     | GENERAL PRACTITIONER, CAMPANIA                 |
| ELIO         | ASSISI        | GENERAL PRACTITIONER, REGGIO EMILIA            |
| GIUSEPPE     | AVANZINO      | GENERAL PRACTITIONER, GENOVA                   |
| INES         | AVINO         | GENERAL PRACTITIONER, GAETA                    |
| DINO         | BACCA         | GENERAL PRACTITIONER, GENOVA                   |
| RAFFAELLA    | BADONI        | GENERAL PRACTITIONER, GENOVA                   |
| ANTONIA      | BALDASSARRE   | GENERAL PRACTITIONER, COSENZA                  |
| SALVATORE    | BALDINI       | GENERAL PRACTITIONER, BRESCIA                  |
| FERNANDO     | BALLARATI     | GENERAL PRACTITIONER, BUSTO ARSIZIO            |
| SALVATORE    | BALSAMO       | GENERAL PRACTITIONER, RENDE                    |
| CIRO GIMMI   | BANCO         | GENERAL PRACTITIONER, CAMPANIA                 |
| CHIARA       | BARALDI       | GENERAL PRACTITIONER, CURTANONE                |
| GIUSEPPE     | BARBAGALLO    | GENERAL PRACTITIONER, CATANIA                  |
| MASSIMO      | BARBIERI      | GENERAL PRACTITIONER, REGGIO EMILIA            |
| NADIA        | BARGELLINI    | GENERAL PRACTITIONER, FLORENCE                 |
| ANTONELLA    | BARSANTI      | GENERAL PRACTITIONER, PISA                     |
| ROSARIO      | BATTIATO      | GENERAL PRACTITIONER, CATANIA                  |
| ALESSIA      | BELLOMO       | GENERAL PRACTITIONER, ROME                     |
| MARCO        | BENFENATI     | GENERAL PRACTITIONER, REGGIO EMILIA            |
| MARIA        | BENINCASA     | GENERAL PRACTITIONER, ROME                     |

|                |             |                                       |
|----------------|-------------|---------------------------------------|
| GAVINO         | BERARDESCA  | GENERAL PRACTITIONER, CAMPANIA        |
| CHIARA         | BERNABEI    | GENERAL PRACTITIONER, REGGIO EMILIA   |
| EMILIA         | BERNACCA    | GERONTOLOGIST, MASSA CARRARA          |
| ERMEN          | BERNARDI    | GENERAL PRACTITIONER, REGGIO EMILIA   |
| STEFANO        | BERNI       | GENERAL PRACTITIONER, LIVORNO         |
| STEFANO        | BIADENE     | GENERAL PRACTITIONER, PISTOIA         |
| MASSIMILIANO   | BIANCHI     | CARDIOLOGIST, PISA                    |
| FRANCESCO      | BISCOTTO    | GENERAL PRACTITIONER, CALTANISSETTA   |
| MARTINA        | BISHARA     | GENERAL PRACTITIONER, REGGIO EMILIA   |
| ANGELO         | BISOFFI     | GENERAL PRACTITIONER, MAGENTA         |
| MATTEO         | BITOSSI     | GENERAL PRACTITIONER, FLORENCE        |
| PIETRO         | BITTO       | GENERAL PRACTITIONER, MESSINA         |
| SUSANNA        | BOCCHETTI   | GENERAL PRACTITIONER, CAMPANIA        |
| GIANLUCA       | BOCCHINO    | GENERAL PRACTITIONER, GENOVA          |
| GIUSEPPE       | BOEMIO      | GENERAL PRACTITIONER, CAMPANIA        |
| LUIGI          | BOEMIO      | GENERAL PRACTITIONER, CAMPANIA        |
| MARIA PAOLA    | BOLES       | GENERAL PRACTITIONER, BRESCIA         |
| SANTINA        | BONATO      | GENERAL PRACTITIONER, MILAN           |
| MARCO          | BONFIGLIO   | GENERAL PRACTITIONER, SIRACUSA        |
| EMMA           | BORRELLI    | PNEUMOLOGIST, SIENA                   |
| MASSIMILIANO   | BORRI       | GENERAL PRACTITIONER, FLORENCE        |
| MARCO          | BOTTONI     | GENERAL PRACTITIONER, REGGIO EMILIA   |
| FILIPPO        | BOVE        | GENERAL PRACTITIONER, CAMPANIA        |
| CRISTIAN       | BRAGHIN     | GENERAL PRACTITIONER, REGGIO EMILIA   |
| ANTONIO        | BRAGIOTTO   | GENERAL PRACTITIONER, REGGIO EMILIA   |
| SILVIA         | BRESSY      | GENERAL PRACTITIONER, GENOVA          |
| LUIGI          | BRIA        | GENERAL PRACTITIONER, VILLA PIANA     |
| MARINA         | BRICCHI     | GENERAL PRACTITIONER, MILAN           |
| DONATELLA      | BRILLANTI   | GENERAL PRACTITIONER, REGGIO EMILIA   |
| SALVATORE      | BUCCHIERI   | PNEUMOLOGIST, PALERMO                 |
| ALESSANDRA     | BUFFO       | GENERAL PRACTITIONER, REGGIO EMILIA   |
| EMANUELE       | BULLARA     | GENERAL PRACTITIONER, AGRIGENTO       |
| TIZIANA        | BUNIVA      | GENERAL PRACTITIONER, GENOVA          |
| VALENTINA      | BUONUOMO    | GENERAL PRACTITIONER, SAN VITO ROMANO |
| ERNANI         | BUSSETTA    | GENERAL PRACTITIONER, BARI            |
| LUCA           | BUZZERIO    | GENERAL PRACTITIONER, TARANTO         |
| ALFONSO        | CAFASSO     | GENERAL PRACTITIONER, CAMPANIA        |
| MARINA         | CAGOL       | GENERAL PRACTITIONER, REGGIO EMILIA   |
| ALDO           | CALCAGNILE  | GENERAL PRACTITIONER, GENOVA          |
| VINCENZO       | CALI        | GENERAL PRACTITIONER, CATANIA         |
| DANIELA        | CALIENDO    | GENERAL PRACTITIONER, CAMPANIA        |
| CLAUDIO        | CALLIPO     | GENERAL PRACTITIONER, COSENZA         |
| MARIO          | CALO'       | GENERAL PRACTITIONER, REGGIO EMILIA   |
| MIRELLA        | CAMARCA     | GENERAL PRACTITIONER, ROME            |
| ROBERTO        | CAMOS       | GENERAL PRACTITIONER, GENOVA          |
| ANNA           | CAMPISI     | GENERAL PRACTITIONER, SIRACUSA        |
| GIOVANNI       | CAMPOLO     | GENERAL PRACTITIONER, ROSSANO         |
| PASQUALE       | CANDELA     | PNEUMOLOGIST, REGGIO CALABRIA         |
| ANTONELLA      | CANGELOSI   | GENERAL PRACTITIONER, PALERMO         |
| SAVERIO        | CANITANO    | GENERAL PRACTITIONER, CAMPANIA        |
| LUCIA          | CANNARELLA  | GENERAL PRACTITIONER, SIRACUSA        |
| MARCO          | CAPODACQUA  | GENERAL PRACTITIONER, CAMPANIA        |
| ALESSANDRA     | CAPPARUCCI  | CARDIOLOGIST, VITERBO                 |
| MAURIZIO       | CARANNANTE  | GENERAL PRACTITIONER, CAMPANIA        |
| FABIO          | CARATTI     | GENERAL PRACTITIONER, GENOVA          |
| ANDREA         | CARAVARIO   | GENERAL PRACTITIONER, GENOVA          |
| NADIA ENZA     | CARBONE     | GENERAL PRACTITIONER, CAMPANIA        |
| CORRADO        | CARNEMOLLA  | GENERAL PRACTITIONER, SIRACUSA        |
| GIOVANNI       | CARUSO      | GENERAL PRACTITIONER, PALERMO         |
| SABRINA        | CARVELLO    | GENERAL PRACTITIONER, AGRIGENTO       |
| MARIA CONCETTA | CASADONTE   | GENERAL PRACTITIONER, GENOVA          |
| GAETANO        | CASALE      | GYNECOLOGIST, TARANTO                 |
| GAETANO        | CASALE      | GYNECOLOGIST, TARANTO                 |
| ROMINA         | CASARETTO   | GENERAL PRACTITIONER, GENOVA          |
| ANTHONY        | CASTELLITTO | GENERAL PRACTITIONER, REGGIO EMILIA   |
| ANGELA         | CASTRONUOVO | GENERAL PRACTITIONER, REGGIO EMILIA   |

|                 |              |                                            |
|-----------------|--------------|--------------------------------------------|
| ANTONELLA       | CATALDI      | ONCOLOGIST, BARI                           |
| MARIO           | CATALDO      | GENERAL PRACTITIONER, CAMPANIA             |
| MASSIMO         | CATANUSO     | GENERAL PRACTITIONER, CATANIA              |
| MARISA          | CATERINO     | GENERAL PRACTITIONER, CAMPANIA             |
| FLORA           | CAVA         | GENERAL PRACTITIONER, RENDE                |
| MANUELA         | CAVALLI      | GENERAL PRACTITIONER, REGGIO EMILIA        |
| ENRICO          | CAZZOLA      | GENERAL PRACTITIONER, GENOVA               |
| RICCARDO        | CAZZUFFI     | GENERAL PRACTITIONER, REGGIO EMILIA        |
| GIUSEPPE        | CERBONE      | GENERAL PRACTITIONER, CAMPANIA             |
| ANDREA          | CERVIA       | GENERAL PRACTITIONER, GENOVA               |
| ANTONIO         | CHIAPPONI    | GENERAL PRACTITIONER, REGGIO EMILIA        |
| RITA            | CHIARAMONTE  | GENERAL PRACTITIONER, SIRACUSA             |
| DAMIANO         | CHIESA       | GENERAL PRACTITIONER, REGGIO EMILIA        |
| MARIO           | CHIMENTI     | GENERAL PRACTITIONER, SAN BENEDETTO ULLANO |
| LUCA            | CHIRIZZI     | GENERAL PRACTITIONER, REGGIO EMILIA        |
| PIERA           | CIACCIA      | GENERAL PRACTITIONER, REGGIO EMILIA        |
| CRISTINA        | CIANI        | CARDIOLOGIST, ROME                         |
| FEDERICO        | CIAPPARELLI  | GENERAL PRACTITIONER, LIVORNO              |
| MICHELINO       | CIARAMITA    | GENERAL PRACTITIONER, TRAPANI              |
| ANTONELLA M. I. | CICALE       | GENERAL PRACTITIONER, CAMPANIA             |
| MARIA           | CICCARELLO   | GENERAL PRACTITIONER, PALERMO              |
| MASSIMO         | CICINELLI    | GENERAL PRACTITIONER, VITERBO              |
| DONATELLA       | CILIO        | GENERAL PRACTITIONER, SIRACUSA             |
| ANTONELLA       | CIMARELLI    | GENERAL PRACTITIONER, ANCONA               |
| MARIA LUCIA     | CIMARRUSTI   | GENERAL PRACTITIONER, REGGIO EMILIA        |
| ELENA           | CISOTTO      | GENERAL PRACTITIONER, GENOVA               |
| SUSANNA         | COFONE       | GENERAL PRACTITIONER, COSENZA              |
| ALBINO          | COLUCCIOLLO  | GENERAL PRACTITIONER, CAMPANIA             |
| SALVATORE       | CONCILIO     | GENERAL PRACTITIONER, CAMPANIA             |
| CARMELO         | CONIGLIONE   | GENERAL PRACTITIONER, REGGIO EMILIA        |
| GIANFRANCO      | CONTI        | GENERAL PRACTITIONER, SIRACUSA             |
| ROSA            | CORBISIERO   | GENERAL PRACTITIONER, CAMPANIA             |
| GENNARO         | CORBO        | GENERAL PRACTITIONER, CAMPANIA             |
| MAURIZIO        | CORONELLI    | GENERAL PRACTITIONER, PAVIA                |
| CARMELA         | COSTAGLIOLA  | GENERAL PRACTITIONER, CAMPANIA             |
| LUIGI           | COSTANZO     | GENERAL PRACTITIONER, CAMPANIA             |
| GIUSY           | CRIMI        | PNEUMOLOGIST, PALERMO                      |
| MASSIMO         | CUCCHIARA    | GENERAL PRACTITIONER, GENOVA               |
| GIANPAOLO       | CUPELLINI    | GENERAL PRACTITIONER, MILAN                |
| IVAN            | CURCIO       | GENERAL PRACTITIONER, CAMPANIA             |
| ANNALISA        | CURTAZ       | GENERAL PRACTITIONER, GENOVA               |
| SIMONA          | D'AGOSTINO   | GENERAL PRACTITIONER, CAMPANIA             |
| PIETRO          | D'AMICIS     | GENERAL PRACTITIONER, ROME                 |
| ANGELO          | D'ANDRIA     | GERONTOLOGIST, RENDE                       |
| ROSALBA         | D'ANGELIS    | GENERAL PRACTITIONER, VITERBO              |
| MARIA PIA       | D'ARIES      | GENERAL PRACTITIONER, RENDE                |
| STEFANIA        | D'ONORIO     | GENERAL PRACTITIONER, ROME                 |
| ANNAMARIA       | D'ERRICO     | GENERAL PRACTITIONER, CAMPANIA             |
| CORRADO         | DANTI        | GENERAL PRACTITIONER, LIVORNO              |
| EVA             | DAVÌ         | PNEUMOLOGIST, PALERMO                      |
| TIZIANA         | DE AMICIS    | GENERAL PRACTITIONER, REGGIO EMILIA        |
| LINO            | DE ANGELIS   | GENERAL PRACTITIONER, CAMPANIA             |
| EMILIO          | DE ANGELIS   | GENERAL PRACTITIONER, CAMPANIA             |
| GASPARE         | DE BONO      | GENERAL PRACTITIONER, CAMPANIA             |
| PIERPAOLO       | DE FENU      | GENERAL PRACTITIONER, ROME                 |
| MARCO           | DE FILIPPIS  | GENERAL PRACTITIONER, FORMIA               |
| BERNARDO        | DE FRANCO    | GENERAL PRACTITIONER, CIRÒ                 |
| FRANCESCA R.    | DE JORIO     | GENERAL PRACTITIONER, GENOVA               |
| ALBERTO         | DE LISO      | GENERAL PRACTITIONER, MILAN                |
| FRANCESCA       | DE MAGISTRIS | GENERAL PRACTITIONER, LUCERA               |
| CRISTINA        | DE PASQUALE  | GENERAL PRACTITIONER, MILAN                |
| GENNARO         | DE SANTO     | GENERAL PRACTITIONER, CAMPANIA             |
| GERARDO         | DE STEFANO   | GENERAL PRACTITIONER, CAMPANIA             |
| FRANCESCO       | DE TOMMASI   | GENERAL PRACTITIONER, NOCI                 |
| MARIA TERESA    | DE VITA      | GENERAL PRACTITIONER, LUCERA               |
| ANTONELLA       | DEL CHIARO   | GENERAL PRACTITIONER, PISA                 |

|                 |                |                                            |
|-----------------|----------------|--------------------------------------------|
| MARINELLA       | DEL GIUDICE    | GENERAL PRACTITIONER, ROME                 |
| FRANCESCO       | DEL PRETE      | GENERAL PRACTITIONER, CAMPANIA             |
| LUIGI           | DEL PRETE      | GENERAL PRACTITIONER, CAMPANIA             |
| ADOLFO          | DEL VECCHIO    | GENERAL PRACTITIONER, CAMPANIA             |
| DANIELE         | DELEO          | GENERAL PRACTITIONER, PALERMO              |
| COSTANTINO      | DELL'ACQUA     | GENERAL PRACTITIONER, CAMPANIA             |
| PAOLO           | DELL'ORTO      | GENERAL PRACTITIONER, MONZA                |
| UBALDO          | DELUCCHI       | GENERAL PRACTITIONER, REGGIO EMILIA        |
| LEO             | DI BARTOLO     | GENERAL PRACTITIONER, TRAPANI              |
| FILOMENA        | DI BENEDETTO   | GENERAL PRACTITIONER, CAMPANIA             |
| ANGELO          | DI CARLUCCIO   | GENERAL PRACTITIONER, CAMPANIA             |
| LORENZO         | DI DONATO      | GENERAL PRACTITIONER, CAMPANIA             |
| NICOLA          | DI FIORE       | GENERAL PRACTITIONER, CAMPANIA             |
| ANNAMARIA       | DI FULGO       | GENERAL PRACTITIONER, PALERMO              |
| VINCENZO        | DI GARBO       | GENERAL PRACTITIONER, PALERMO              |
| ANTONIO         | DI LASCIO      | GENERAL PRACTITIONER, ROME                 |
| CARMELA         | DI LUCIANO     | GENERAL PRACTITIONER, SIRACUSA             |
| ANTONIO         | DI MONACO      | GENERAL PRACTITIONER, CAMPANIA             |
| ANDREA          | DI PALMA       | GENERAL PRACTITIONER, CAMPANIA             |
| ALESSANDRA      | DI PERNA       | GENERAL PRACTITIONER, FONDI                |
| MARIA MADDALENA | DI SARIO       | GENERAL PRACTITIONER, GENOVA               |
| ANTONIO         | DI SORBO       | GENERAL PRACTITIONER, CAMPANIA             |
| GENNARO         | DI TOTA        | GENERAL PRACTITIONER, CAMPANIA             |
| MARIA PIA       | DIANA          | GENERAL PRACTITIONER, FOGGIA               |
| ALFONSO         | DIANA          | GENERAL PRACTITIONER, CAMPANIA             |
| FILOMENA        | DIBARI         | GENERAL PRACTITIONER, REGGIO EMILIA        |
| ELIO            | DOCIMO         | GENERAL PRACTITIONER, CAMPANIA             |
| GABRIELE        | DRAGONE        | GENERAL PRACTITIONER, SAN BENEDETTO ULLANO |
| ETTORE          | DRUIDO         | GENERAL PRACTITIONER, MESSINA              |
| PAOLO           | ELGORNI BASEVI | GENERAL PRACTITIONER, REGGIO EMILIA        |
| ANTONIO         | FALANGA        | GENERAL PRACTITIONER, CAMPANIA             |
| MICHELA         | FASOLO         | GENERAL PRACTITIONER, REGGIO EMILIA        |
| ALFREDO         | FAVA           | SURGEON, ROME, ITALY                       |
| MELANIA         | FAVARO         | GENERAL PRACTITIONER, COLOGNO MONZESE      |
| PROVVIDENZA     | FAZIO          | GENERAL PRACTITIONER, GENOVA               |
| GIOVANNI CESARE | FEDELE         | GENERAL PRACTITIONER, TERRACINA            |
| ANNAMARIA       | FEDI           | GENERAL PRACTITIONER, PISTOIA              |
| FRANCESCO       | FERRARI        | GENERAL PRACTITIONER, REGGIO EMILIA        |
| BERNARDO        | FERRARO        | GENERAL PRACTITIONER, CAPO IZZU            |
| ETTORE          | FERRARO        | GENERAL PRACTITIONER, CAMPANIA             |
| GENNARO         | FERRO          | GENERAL PRACTITIONER, CAMPANIA             |
| ANTONELLA       | FICI           | GENERAL PRACTITIONER, TRAPANI              |
| CLAUDIO         | FILACCHIONE    | GENERAL PRACTITIONER, PALUDI               |
| FABIO           | FINTSCHNY      | GENERAL PRACTITIONER, REGGIO EMILIA        |
| GAETANO         | FIORELLINO     | GENERAL PRACTITIONER, RENDE                |
| MARCO           | FIorentINI     | GENERAL PRACTITIONER, LIVORNO              |
| LUIGI           | FIorentINO     | GENERAL PRACTITIONER, ROME                 |
| LUIGI           | FORCINA        | PNEUMOLOGIST, ROME                         |
| WILMA           | FORNONI        | GENERAL PRACTITIONER, CINISELLO BALSAMO    |
| PAOLO           | FRADDOSIO      | GENERAL PRACTITIONER, ROME                 |
| MAURIZIO        | FRAMARIN       | GENERAL PRACTITIONER, GENOVA               |
| PIETRO          | FRANCO         | GENERAL PRACTITIONER, CAMPANIA             |
| VITO            | FRARA          | GENERAL PRACTITIONER, GENOVA               |
| MASSIMO         | FRARRICCIARDI  | GENERAL PRACTITIONER, CAMPANIA             |
| RINA            | FRATELORETO    | GENERAL PRACTITIONER, FRASCATI             |
| ALICE           | FRIGOTTO       | GENERAL PRACTITIONER, REGGIO EMILIA        |
| CARLO           | FULGENZI       | GENERAL PRACTITIONER, GROTTAFERRATA        |
| STEFANO         | FULLI          | GENERAL PRACTITIONER, ROME                 |
| DEMETRIO        | FUSARO         | GENERAL PRACTITIONER, SAN DEMETRIO         |
| MICHELE         | GALATI         | GENERAL PRACTITIONER, REGGIO EMILIA        |
| GIUSEPPE        | GALATI         | GENERAL PRACTITIONER, REGGIO EMILIA        |
| GIUSEPPE        | GALETTA        | GENERAL PRACTITIONER, REGGIO CALABRIA      |
| ANNA            | GALLOTTA       | GENERAL PRACTITIONER, BRESCIA              |
| GIULIANO        | GAMBA          | GENERAL PRACTITIONER, GENOVA               |
| RODOLFO         | GAMBA          | GENERAL PRACTITIONER, GENOVA               |
| SANDRO          | GAMBERONI      | GENERAL PRACTITIONER, REGGIO EMILIA        |

|              |                  |                                       |
|--------------|------------------|---------------------------------------|
| FILOMENA     | GAMBUTI          | GENERAL PRACTITIONER, GUIDONIA        |
| ANDREA       | GARBINI          | GENERAL PRACTITIONER, ROME            |
| GIUSEPPE     | GASPARO          | GENERAL PRACTITIONER, MESSINA         |
| EZIO         | GASTALDI         | GENERAL PRACTITIONER, GENOVA          |
| MARCELLO     | GAUDIO           | GENERAL PRACTITIONER, RENDE           |
| ELISA        | GELSUMINI        | GENERAL PRACTITIONER, PRATO           |
| ELVIRA       | GENOVESE         | GENERAL PRACTITIONER, CAMPANIA        |
| GIUSEPPE     | GENTILE          | GENERAL PRACTITIONER, CROTONE         |
| GIUSEPPE     | GIANCASPRO       | GENERAL PRACTITIONER, ROME            |
| SERGIO       | GIANCOLA         | GENERAL PRACTITIONER, GENOVA          |
| SILVIA       | GIANNESI         | GENERAL PRACTITIONER, PISA            |
| STEFANO      | GILLARD MAGNAN   | GENERAL PRACTITIONER, GENOVA          |
| ROSALBA      | GIOFRÈ           | GENERAL PRACTITIONER, REGGIO EMILIA   |
| PAOLO        | GIORDO           | NEUROLOGIST, FLORENCE                 |
| GIROLAMO     | GIORLANDO        | GENERAL PRACTITIONER, GENOVA          |
| DANIELE      | GIOVANNETTI      | GENERAL PRACTITIONER, ROME            |
| CARLA        | GIOVANNINI       | GENERAL PRACTITIONER, REGGIO EMILIA   |
| GIULIA       | GIOZANI          | GENERAL PRACTITIONER, BRESCIA         |
| ROBERTA      | GIUCA            | GENERAL PRACTITIONER, SIRACUSA        |
| MICHELE      | GOTELLI          | GENERAL PRACTITIONER, GENOVA          |
| NADIA        | GRADINATI        | GENERAL PRACTITIONER, PAVIA           |
| MARCO        | GRAMAGLIA        | GENERAL PRACTITIONER, GENOVA          |
| STEFANO      | GRANDI           | GENERAL PRACTITIONER, REGGIO EMILIA   |
| ANTONietta   | GRANDILLI        | GENERAL PRACTITIONER, ROME            |
| LUCIANO      | GRASSO           | GENERAL PRACTITIONER, CATANIA         |
| VINCENZA     | GRECO            | GENERAL PRACTITIONER, BARI            |
| ALESSANDRA   | GRIECO           | GENERAL PRACTITIONER, CAMPANIA        |
| GIULIO       | GRILLETTO        | GENERAL PRACTITIONER, CROTONE         |
| EMMA         | GRIMALDI         | GENERAL PRACTITIONER, CAMPANIA        |
| SILVIA       | GUARDINO         | GENERAL PRACTITIONER, REGGIO EMILIA   |
| GIANCARLO    | GUARINO          | GENERAL PRACTITIONER, FLORENCE        |
| PAOLO        | GUERRAZZI        | GENERAL PRACTITIONER, FLORENCE        |
| MARTINA      | GUERRIERO        | GENERAL PRACTITIONER, REGGIO EMILIA   |
| CONCETTO     | GULLO            | GENERAL PRACTITIONER, CATANIA         |
| ALEXANDER    | GUTMAN           | GENERAL PRACTITIONER, REGGIO EMILIA   |
| CORRADO      | IACOACCI         | PNEUMOLOGIST, SENIGALLIA              |
| LINA         | IAQUINTA         | GENERAL PRACTITIONER, REGGIO EMILIA   |
| SALVATORE    | IMPERIO          | GENERAL PRACTITIONER, ROCCA DI PAPA   |
| ANTONIO      | INFUSINI         | GENERAL PRACTITIONER, REGGIO EMILIA   |
| GESUALDO     | INGEGNERE        | GENERAL PRACTITIONER, ROSARNO         |
| VINCENZO     | IOVINO           | GENERAL PRACTITIONER, CAMPANIA        |
| MANRICO      | ISOPPO           | GENERAL PRACTITIONER, SARZANO         |
| VINCENZO     | LACAVA           | GENERAL PRACTITIONER, CAMPANIA        |
| ROSA         | LAMBERTI         | GENERAL PRACTITIONER, CAMPANIA        |
| ADALGISA     | LANCIANO         | GENERAL PRACTITIONER, REGGIO EMILIA   |
| MARCO        | LANDONI          | GENERAL PRACTITIONER, REGGIO EMILIA   |
| MASSIMILIANO | LANDULFO         | GENERAL PRACTITIONER, CAMPANIA        |
| FORTUNATO M  | LATELLA          | GENERAL PRACTITIONER, ROME            |
| GANDINI      | LATHA            | GENERAL PRACTITIONER, REGGIO EMILIA   |
| MAURO        | LATINA           | GENERAL PRACTITIONER, REGGIO EMILIA   |
| LOREDANA     | LEMBO            | GENERAL PRACTITIONER, CAMPANIA        |
| MICHELA      | LEPRAI           | GENERAL PRACTITIONER, FRASCATI        |
| LUCIA        | LIMITI           | GENERAL PRACTITIONER, ANCONA          |
| STEFANO      | LIMONTINI        | GENERAL PRACTITIONER, NOVARA          |
| FRANCESCO    | LIPPOLIS         | GENERAL PRACTITIONER, NOCI            |
| ALESSIO      | LO CASCIO        | GENERAL PRACTITIONER, PALERMO         |
| MANUELA      | LO GIUDICE       | GENERAL PRACTITIONER, PALERMO         |
| GIULIA       | LOGOLUSO         | GENERAL PRACTITIONER, ROME            |
| ALESSANDRO   | LOMBARDI         | GENERAL PRACTITIONER, GENOVA          |
| ANGELO       | LOMBARDO         | GENERAL PRACTITIONER, AGRIGENTO       |
| MASSIMO      | LOTURCO          | GENERAL PRACTITIONER SACROFANO        |
| LETIZIA      | LUCHETTI         | GENERAL PRACTITIONER, PRATO           |
| CARMINE      | LUONGO           | GENERAL PRACTITIONER, GAETA           |
| DANIELA      | LUZZI            | GENERAL PRACTITIONER, MILAN           |
| ROBERTO      | MACCAPANI        | GENERAL PRACTITIONER, COLOGNO MONZESE |
| RICCARDO     | MACRÌ DE MARTINO | GENERAL PRACTITIONER, BARI            |

|             |               |                                         |
|-------------|---------------|-----------------------------------------|
| ROMUALDO    | MAGLIULO      | GENERAL PRACTITIONER, CAMPANIA          |
| ALICE       | MAGRINI       | GENERAL PRACTITIONER, PRATO             |
| MOHAMMED    | MAHAMMOD      | GENERAL PRACTITIONER, BRESCIA           |
| CHIARA      | MAMMARELLA    | CARDIOLOGIST, CHIETI                    |
| MIRTA       | MANCINELLA    | GENERAL PRACTITIONER, ROME              |
| FRANCO      | MANCINI       | GENERAL PRACTITIONER, FORMIA            |
| ILARIA      | MANCINI       | CARDIOLOGIST, LADISPOLI                 |
| GIUSEPPE    | MANCINO       | GENERAL PRACTITIONER, CALTANISSETTA     |
| FILIPPO     | MANFREDI      | GENERAL PRACTITIONER, BARI              |
| ALBERTO     | MANGIACAVALLO | GENERAL PRACTITIONER LECCE              |
| CALOGERO    | MANISCALCO    | GENERAL PRACTITIONER, CAMPANIA          |
| DORIANA     | MANNINO       | GENERAL PRACTITIONER, PALERMO           |
| ANNA        | MANNO         | GENERAL PRACTITIONER, GENOVA            |
| ALESSANDRO  | MANUEDDU      | GENERAL PRACTITIONER, GENOVA            |
| LAURA       | MANZINI       | GENERAL PRACTITIONER, GENOVA            |
| ALESSANDRO  | MARCACCIO     | GENERAL PRACTITIONER, ROME              |
| ILARIA      | MARCHETIELLO  | GENERAL PRACTITIONER, CAMPANIA          |
| GIORGINA    | MARCHINI      | GENERAL PRACTITIONER, ROME              |
| FRANCESCA   | MARFELLA      | GENERAL PRACTITIONER, GENOVA            |
| VITA        | MARINO        | GENERAL PRACTITIONER, TRAPANI           |
| MARGHERITA  | MARRA         | GENERAL PRACTITIONER, REGGIO EMILIA     |
| GIACOMO     | MARRI         | GENERAL PRACTITIONER, GROSSETO          |
| GIOVANNI    | MARROCCO      | GENERAL PRACTITIONER, CAMPANIA          |
| PATRIZIA    | MARZANO       | GENERAL PRACTITIONER, CAMPANIA          |
| LUCA        | MASSIMINO     | GENERAL PRACTITIONER, ROME              |
| MASSIMO     | MASTROLILLI   | GENERAL PRACTITIONER, VAPRIO D'ADDA     |
| ALFONSO     | MATARRESE     | CARDIOLOGIST, ASCOLI                    |
| VITOANTONIO | MATARRESE     | GENERAL PRACTITIONER, BARI              |
| MARIO       | MAURIELLO     | GENERAL PRACTITIONER, CAMPANIA          |
| ALESSIA     | MAURIZI       | GENERAL PRACTITIONER, ROME              |
| VINCENZI    | MAURIZIO      | GENERAL PRACTITIONER BRESCIA            |
| IMMACOLATA  | MAURO         | GENERAL PRACTITIONER, CAMPANIA          |
| FEDERICO    | MAZZA         | GENERAL PRACTITIONER, CAMPANIA          |
| MAURO       | MAZZAFERRO    | GENERAL PRACTITIONER, REGGIO EMILIA     |
| MASSIMO     | MAZZOCCHI     | GENERAL PRACTITIONER, MILAN             |
| BARBARA     | MAZZONI       | GENERAL PRACTITIONER BRESCIA            |
| MASSIMO     | MEARDI        | GENERAL PRACTITIONER, GENOVA            |
| ENRICO      | MELILLO       | GENERAL PRACTITIONER, CAMPANIA          |
| ELISA       | MERCURI       | GENERAL PRACTITIONER, VITERBO           |
| DANIELA     | MESSINA       | GENERAL PRACTITIONER, SIRACUSA          |
| CRISTIANO   | MESSINA       | GENERAL PRACTITIONER, MILAN             |
| ISABELLA    | MICCOLIS      | GENERAL PRACTITIONER, CINISELLO BALSAMO |
| ANGELA      | MIGLIO        | GENERAL PRACTITIONER, MILAN             |
| UGO         | MIRABELLA     | GENERAL PRACTITIONER, CATANIA           |
| VALENTINA   | MIRAGLINO     | GENERAL PRACTITIONER, BARI              |
| MARCO       | MIRONE        | GENERAL PRACTITIONER, REGGIO EMILIA     |
| ANNA MARIA  | MOLLO         | GENERAL PRACTITIONER, GENOVA            |
| ANNA MARIA  | MONGILLO      | GENERAL PRACTITIONER, CAMPANIA          |
| PATRIZIA    | MONTANARI     | CARDIOLOGIST, OLBIA                     |
| FEDERICO    | MONTANARI     | GENERAL PRACTITIONER, REGGIO EMILIA     |
| MELCHIORRE  | MONTI         | GENERAL PRACTITIONER, TRAPANI           |
| GAETANO     | MONTONERI     | GENERAL PRACTITIONER, SIRACUSA          |
| LETIZIA     | MONTONE       | GENERAL PRACTITIONER, CATANIA           |
| MARIA       | MONTORI       | GENERAL PRACTITIONER, REGGIO EMILIA     |
| MILENA      | MORI          | GENERAL PRACTITIONER, VIGEVANO          |
| ANGELO      | MORRONE       | GENERAL PRACTITIONER, REGGIO EMILIA     |
| CARLO       | MORTELLARO    | GENERAL PRACTITIONER, CAMPANIA          |
| DOMENICO    | MOSCA         | GENERAL PRACTITIONER, BARI              |
| VINCENZO    | MOTTA         | GENERAL PRACTITIONER, CATANIA           |
| PIERGIORGIO | MUFFOLINI     | GENERAL PRACTITIONER BRESCIA            |
| SARA        | MUFFOLINI     | GENERAL PRACTITIONER BRESCIA            |
| ERNESTO     | MULINO        | PNUMOLOGIST, SAN MARCO                  |
| PIERO       | MUOLO         | GENERAL PRACTITIONER, BARI              |
| AURORA      | MURANA        | GENERAL PRACTITIONER, TRAPANI           |
| MASSIMO     | MURARI        | GENERAL PRACTITIONER, MILAN             |
| ENRICO      | NALDI         | GENERAL PRACTITIONER, FLORENCE          |

|                 |            |                                       |
|-----------------|------------|---------------------------------------|
| MARA            | NALIN      | GENERAL PRACTITIONER, REGGIO EMILIA   |
| MAURIZIO        | NAPOLI     | GENERAL PRACTITIONER, REGGIO CALABRIA |
| GIANCARLO       | NAPOLITANO | GENERAL PRACTITIONER, COSENZA         |
| GRAZIELLA       | NARDINI    | GENERAL PRACTITIONER, REGGIO EMILIA   |
| ANTONIO         | NARDO      | GENERAL PRACTITIONER, CATANIA         |
| MASSIMO         | NEBBIA     | GENERAL PRACTITIONER, GENOVA          |
| STEFANO         | NERI       | GENERAL PRACTITIONER, LIVORNO         |
| FRANCO          | NICOLACI   | GENERAL PRACTITIONER, GENOVA          |
| ELISA           | NICOLOTTO  | GENERAL PRACTITIONER, GENOVA          |
| ANTONIO         | NIEDDU     | GENERAL PRACTITIONER, SASSARI         |
| BEATRICE        | NORDIO     | GENERAL PRACTITIONER, REGGIO EMILIA   |
| ENRICO          | NOTARI     | GENERAL PRACTITIONER, REGGIO EMILIA   |
| FABRIZIO        | NOVEMBRE   | GENERAL PRACTITIONER, TARANTO         |
| MARIA FRANCESCA | NOVI ROSA  | GENERAL PRACTITIONER, GENOVA          |
| COSIMO          | NUZZO      | GENERAL PRACTITIONER, LECCE           |
| GIANLUCA        | OGNIBENE   | GENERAL PRACTITIONER, REGGIO EMILIA   |
| ANTONELLA       | ORIOLI     | GENERAL PRACTITIONER, MILAN           |
| EFREM           | ORIZZONTE  | GENERAL PRACTITIONER, GENOVA          |
| GIOVANNI        | ORLANDO    | GENERAL PRACTITIONER, TARANTO         |
| MAFALDA         | ORLANDO    | PNEUMOLOGIST, ROME                    |
| GIUSEPPE        | ORTUSO     | GENERAL PRACTITIONER, REGGIO EMILIA   |
| RITA            | PACHECO    | GENERAL PRACTITIONER, GROSSETO        |
| VINCENZO        | PAGANO     | GENERAL PRACTITIONER, REGGIO CALABRIA |
| ROSANNA         | PAGLIARA   | GENERAL PRACTITIONER, BRINDISI        |
| MARINA          | PAGLIARINI | GENERAL PRACTITIONER, SASSARI         |
| MARKUS          | PAGLIERO   | GENERAL PRACTITIONER, GENOVA          |
| FRANCESCA       | PALAGANO   | GENERAL PRACTITIONER, ROME            |
| MAURO           | PALLADINO  | GENERAL PRACTITIONER, ROME            |
| CARMEN          | PALMIERI   | GENERAL PRACTITIONER, REGGIO EMILIA   |
| DANIELE         | PALUMBO    | GENERAL PRACTITIONER, CAMPANIA        |
| PIETRO          | PANESSA    | GENERAL PRACTITIONER, TARANTO         |
| ANTONIO         | PANICO     | GENERAL PRACTITIONER, CAMPANIA        |
| GIORGIO         | PAOLI      | GENERAL PRACTITIONER, CAMPANIA        |
| MARCELLO        | PAOLO      | GENERAL PRACTITIONER, REGGIO EMILIA   |
| DANIELA         | PAPARELLA  | GENERAL PRACTITIONER, CAMPANIA        |
| MAURIZIO        | PARISI     | GENERAL PRACTITIONER, BRESCIA         |
| ERMENEGILDO     | PASOTTI    | GENERAL PRACTITIONER, BRESCIA         |
| MARINO          | PASQUALINA | GENERAL PRACTITIONER, REGGIO EMILIA   |
| VINCENZO        | PASSARO    | GENERAL PRACTITIONER, CAMPANIA        |
| ANTONIO MICHELE | PASTORINO  | GENERAL PRACTITIONER, GENOVA          |
| RITA            | PATRONO    | GENERAL PRACTITIONER, ROME            |
| PAOLO           | PATTI      | GENERAL PRACTITIONER, TRAPANI         |
| DANIELA         | PATTI      | GENERAL PRACTITIONER, REGGIO EMILIA   |
| MADDALENA       | PECORINI   | GENERAL PRACTITIONER, PAVIA           |
| PALMA           | PELLEGRINO | GENERAL PRACTITIONER, COSENZA         |
| LUIGI           | PELLEGRINO | GENERAL PRACTITIONER, RENDE           |
| MARINA          | PELLICIONI | GENERAL PRACTITIONER, ROME            |
| CLAUDIO         | PEREGO     | GENERAL PRACTITIONER, MONZA           |
| SILVIA          | PERGHER    | GENERAL PRACTITIONER, REGGIO EMILIA   |
| IVONNE          | PERRI      | GENERAL PRACTITIONER, REGGIO EMILIA   |
| PAOLA           | PIANA      | GENERAL PRACTITIONER, PAVIA           |
| PIETRO          | PIAZZA     | GENERAL PRACTITIONER, REGGIO EMILIA   |
| GIUSEPPE        | PIAZZOLLA  | GENERAL PRACTITIONER, TARANTO         |
| FRANCESCO       | PICCITTO   | GENERAL PRACTITIONER, TRAPANI         |
| MARCELLO        | PILI       | GENERAL PRACTITIONER, ROME            |
| ROSSANA         | PILO       | GENERAL PRACTITIONER, TEMPIO          |
| ANNA MARIA      | PINI       | GENERAL PRACTITIONER, GENOVA          |
| FABIO           | PIOVAN     | GENERAL PRACTITIONER, REGGIO EMILIA   |
| GIACOMO         | PIROZZI    | GENERAL PRACTITIONER, CAMPANIA        |
| CHIARA          | PISANTI    | GENERAL PRACTITIONER, CAMPANIA        |
| OTTAVIO         | PISCIONERI | GENERAL PRACTITIONER, GENOVA          |
| RAFFAELE        | PISCOPO    | GENERAL PRACTITIONER, CAMPANIA        |
| VINCENZO        | PISO       | GENERAL PRACTITIONER, CATANIA         |
| STEFANO         | PLACIDI    | GENERAL PRACTITIONER, ROME            |
| MARTA           | PONCIROLI  | GENERAL PRACTITIONER, MILAN           |
| ARIANNA         | PONZECCHI  | GENERAL PRACTITIONER, PRATO           |

|                 |                  |                                                      |
|-----------------|------------------|------------------------------------------------------|
| VINCENZO        | PORTA            | GENERAL PRACTITIONER, MONZA                          |
| GIUSEPPE        | PROCOPIO         | GENERAL PRACTITIONER, REGGIO EMILIA                  |
| CLAUDIO         | PRONO            | GENERAL PRACTITIONER, ROME                           |
| DANIELA         | PROSERPIO        | GENERAL PRACTITIONER, GENOVA                         |
| ELIDE           | PUCCI            | GENERAL PRACTITIONER, CIAMPINO                       |
| LUCA GABRIELE   | PUNZIANO         | GENERAL PRACTITIONER, ROME                           |
| MARIA ROSARIA   | PUTRINO          | GENERAL PRACTITIONER, CATANIA                        |
| GUIDO           | RAGAZZONI        | GENERAL PRACTITIONER CASTIGLIONE DELLE STIVIERE (MN) |
| EDOARDO CARMELO | RANDAZZO         | GENERAL PRACTITIONER, REGGIO CALABRIA                |
| STEFANO         | RASCHINI         | GENERAL PRACTITIONER RIVOLTA SUL MINCIO (MN)         |
| RITA            | RAUCCI           | GENERAL PRACTITIONER, CAMPANIA                       |
| ENRICHETTA      | RELLECATI        | GENERAL PRACTITIONER GALLARATE                       |
| GUIDO           | RENI             | GENERAL PRACTITIONER, REGGIO EMILIA                  |
| ALESSANDRA      | REPOSI           | GENERAL PRACTITIONER, GENOVA                         |
| PAOLO           | RICCIOLINO       | GENERAL PRACTITIONER, CAMPANIA                       |
| GIOVANNI        | RINALDI          | GENERAL PRACTITIONER, CAMPANIA                       |
| RENATO          | RINARELLI        | GENERAL PRACTITIONER, MONZA                          |
| DAVID           | RISTORI          | GENERAL PRACTITIONER, LIVORNO                        |
| STANISLAO       | RIVETTI          | GENERAL PRACTITIONER, CAMPANIA                       |
| ANTONIO         | RIZZO            | GENERAL PRACTITIONER, CATANIA                        |
| SALVATORE       | RIZZO            | GENERAL PRACTITIONER, CATANIA                        |
| FRANCESCO       | RIZZO            | GENERAL PRACTITIONER, TRAPANI                        |
| MARIA ROSARIA   | RIZZO            | GENERAL PRACTITIONER, TARANTO                        |
| ROMOLO          | RIZZO            | GENERAL PRACTITIONER, CAMPANIA                       |
| DAVIDE          | ROAGNA           | GENERAL PRACTITIONER, GENOVA                         |
| CARMELA         | ROCCIOLO         | GENERAL PRACTITIONER, REGGIO CALABRIA                |
| NICOLÒ          | ROGGERO          | GENERAL PRACTITIONER, GENOVA                         |
| MARINA          | ROIA             | GENERAL PRACTITIONER, MILAN                          |
| PAOLO           | ROMANI           | GENERAL PRACTITIONER, REGGIO EMILIA                  |
| NATALIA         | ROMANO           | GENERAL PRACTITIONER, SIRACUSA                       |
| CLAUDIA         | ROMANO           | GENERAL PRACTITIONER, COSENZA                        |
| EGIDIO          | ROMANO           | GENERAL PRACTITIONER, CROTONE                        |
| FRANCO          | ROMANO           | GENERAL PRACTITIONER, CAMPANIA                       |
| NICOLA          | ROMITO           | GENERAL PRACTITIONER, BARI                           |
| NICOLA          | ROMITO           | GENERAL PRACTITIONER, BARI                           |
| VALERIA         | RONSIVALLE       | PNEUMOLOGIST, CALACIURA                              |
| LANFRANCO       | ROSSI            | GENERAL PRACTITIONER, REGGIO EMILIA                  |
| FEDERICO        | RUFOLO           | GENERAL PRACTITIONER, CAMPANIA                       |
| NICOLA          | RULLI            | GENERAL PRACTITIONER, REGGIO CALABRIA                |
| NICOLA          | RULLI            | GENERAL PRACTITIONER, REGGIO CALABRIA                |
| SERENA          | RUSSO            | GENERAL PRACTITIONER, PALERMO                        |
| PAOLO ACHILLE   | RUSSO            | GENERAL PRACTITIONER, MESSINA                        |
| ROBERTA         | RUSSO            | GENERAL PRACTITIONER, GENOVA                         |
| SALVATORE       | SALEMI           | PNEUMOLOGIST, CALACIURA                              |
| VITTORIO        | SALERNO          | GENERAL PRACTITIONER, CAMPANIA                       |
| AGATA           | SANFILIPPO       | PNEUMOLOGIST, PALERMO                                |
| GIOVANNI        | SANNA            | GENERAL PRACTITIONER, SASSARI                        |
| MARIA GRAZIE    | SANSONE          | GENERAL PRACTITIONER, CAMPANIA                       |
| NICOLA          | SANTORO          | GENERAL PRACTITIONER ROME                            |
| FABIO           | SAPONARO         | GENERAL PRACTITIONER, MILAN                          |
| GIUSEPPE        | SATTA            | GENERAL PRACTITIONER, SASSARI                        |
| CELESTINO       | SAVOIA           | GENERAL PRACTITIONER, CAMPANIA                       |
| ROBERTO         | SCARCIA          | GENERAL PRACTITIONER, BARI                           |
| SALVATORE       | SCHETTINO        | GENERAL PRACTITIONER, CAMPANIA                       |
| PIERO           | SCHIRÒ           | GERONTOLOGIST, PALERMO                               |
| DANIELA         | SCIACCA          | GENERAL PRACTITIONER, SIRACUSA                       |
| GIUSEPPINA      | SCIALDONE        | GENERAL PRACTITIONER, CAMPANIA                       |
| MARCELLO        | SCIFO            | GENERAL PRACTITIONER, CATANIA                        |
| MONICA          | SCOTTI           | GENERAL PRACTITIONER, PAVIA                          |
| ANTONIO         | SCOTTO D'ANTUONO | GENERAL PRACTITIONER, CAMPANIA                       |
| GIUSEPPE        | SCOZZAFAVA       | GENERAL PRACTITIONER, GENOVA                         |
| MARCO           | SEBASTIANI       | GENERAL PRACTITIONER, GENOVA                         |
| FRANCESCO       | SECCIA           | GENERAL PRACTITIONER, SAN GIOVANNI TEATINO (CH)      |
| IVANO           | SERANI           | GENERAL PRACTITIONER, FRASCATI                       |
| SILVIA          | SERRA            | GENERAL PRACTITIONER, VOGHERA                        |
| PIETRO          | SEVERINO         | GENERAL PRACTITIONER, CATANIA                        |



|               |                  |                                          |
|---------------|------------------|------------------------------------------|
| CARMELA       | SICA             | GENERAL PRACTITIONER, CAMPANIA           |
| VINCENZO      | SICA             | GENERAL PRACTITIONER, CAMPANIA           |
| DARIO         | SILVESTRI        | GENERAL PRACTITIONER, MONZA              |
| GIULIA        | SILVESTRI        | GENERAL PRACTITIONER, ROME               |
| DANIELA       | SIRAGUSA         | GENERAL PRACTITIONER, PALERMO            |
| PAOLO         | SIRTORI          | GENERAL PRACTITIONER, MONZA              |
| CRISTINA      | SOLDAVINI        | GENERAL PRACTITIONER, GALLARATE          |
| MARCO         | SOLIERI          | GENERAL PRACTITIONER, REGGIO EMILIA      |
| IRENE         | SORRENTINO       | GENERAL PRACTITIONER, CAMPANIA           |
| CORRADO       | SPAGNOLO         | GENERAL PRACTITIONER, ROME               |
| ROBERTO       | SPAGNOLO         | GENERAL PRACTITIONER, CAMPANIA           |
| ALICE         | SPARACINO        | PHYSIATRIST, PALERMO                     |
| LUCA          | SPIGNO           | GENERAL PRACTITIONER, GENOVA             |
| CARMELA       | SPITALERI        | GENERAL PRACTITIONER, CATANIA            |
| ELENA         | TABONI           | GENERAL PRACTITIONER, BRESCIA            |
| PAOLO         | TAGLIAVINI       | GENERAL PRACTITIONER, REGGIO EMILIA      |
| ROSARIO       | TAIBI            | GENERAL PRACTITIONER, AGRIGENTO          |
| ANGELO        | TALAMAZZINI      | GENERAL PRACTITIONER, PAVIA              |
| GIUSEPPE      | TAMBARO          | GENERAL PRACTITIONER, CAMPANIA           |
| MARIACARLA    | TAMBURELLI       | GENERAL PRACTITIONER, VOGHERA            |
| GIUSEPPE      | TARANTINO        | GENERAL PRACTITIONER, PALERMO            |
| ANGELO        | TAVIANI          | GENERAL PRACTITIONER, GROSSETO           |
| ROSSELLA      | TECCA            | GENERAL PRACTITIONER, ROME               |
| ANTONIO       | TESTA            | GENERAL PRACTITIONER, FONDI              |
| GIANLUCA      | TESTI            | GENERAL PRACTITIONER, ROME               |
| LUCIO         | TETI             | GENERAL PRACTITIONER VIBO VALENTIA       |
| FRANCESCA     | TIERNO           | GENERAL PRACTITIONER, ROME               |
| ANDREA        | TIOZZO           | GENERAL PRACTITIONER, REGGIO EMILIA      |
| ANTONELLA     | TODESCA          | GENERAL PRACTITIONER, CAMPANIA           |
| NICOLA        | TONDINI          | GENERAL PRACTITIONER, NUORO              |
| CINZIA        | TORRACO          | GENERAL PRACTITIONER, FOGGIA             |
| GRAZIA        | TORRISI          | GENERAL PRACTITIONER, CATANIA            |
| MASSIMO       | TOSI             | GENERAL PRACTITIONER, GENOVA             |
| MARIA LORENZA | TOTI             | GENERAL PRACTITIONER, ROME               |
| GIUSEPPE      | TRAETTINO        | GENERAL PRACTITIONER, CAMPANIA           |
| MICHELA       | TRICHINI         | GENERAL PRACTITIONER, CATANIA            |
| GIOVANNI      | TROIA            | GENERAL PRACTITIONER, PALERMO            |
| BASILE        | TSANTES          | GENERAL PRACTITIONER, REGGIO EMILIA      |
| PASQUALE      | TURCO            | GENERAL PRACTITIONER, CAMPANIA           |
| LAURA         | TURCO            | GENERAL PRACTITIONER, GENOVA             |
| CECILIA       | TURINO           | GENERAL PRACTITIONER, CAMPANIA           |
| PAOLA         | ULISSE           | GENERAL PRACTITIONER, ROME               |
| TOMMASO       | URSINI           | CARDIOLOGIST, ASCOLI                     |
| IGNAZIO       | VACCARA          | GENERAL PRACTITIONER, TRAPANI            |
| ELENA         | VACCARI          | GENERAL PRACTITIONER, VOGHERA            |
| MARIA TERESA  | VALENTI CLEMENTE | GENERAL PRACTITIONER, REGGIO CALABRIA    |
| STEFANO       | VANTINI          | GENERAL PRACTITIONER, REGGIO EMILIA      |
| LUIGI         | VARAZZI          | GENERAL PRACTITIONER, ROME               |
| PAOLO         | VARINI           | GENERAL PRACTITIONER, GUIDONIA           |
| GIOVANNI      | VASELLI          | GENERAL PRACTITIONER, MASSA CARRARA      |
| MARIA         | VELARDI          | GENERAL PRACTITIONER, CAMPANIA           |
| ANTONIO       | VELLA            | GENERAL PRACTITIONER, CAMPANIA           |
| FRANCESCO     | VENDITTO         | GENERAL PRACTITIONER, FLORENCE           |
| ADRIANO       | VENDRAMIN        | GENERAL PRACTITIONER, LIVORNO            |
| NUNZIO        | VENTURELLA       | GENERAL PRACTITIONER, GENOVA             |
| ROBERTO       | VERGARA          | GENERAL PRACTITIONER, CAMPANIA           |
| FEDERICA      | VICENTINI        | GENERAL PRACTITIONER, REGGIO EMILIA      |
| FRANCESCA     | VICIDOMINI       | GENERAL PRACTITIONER, FORMIA             |
| ARTURO        | VICINANZA        | GENERAL PRACTITIONER, TARANTO            |
| GIUSEPPE      | VIGNATI          | GENERAL PRACTITIONER BORGHETTO LODIGIANO |
| ASSUNTA       | VIGNOLI          | GENERAL PRACTITIONER, CAMPANIA           |
| ANNALISA      | VIGNOLI          | GENERAL PRACTITIONER, REGGIO EMILIA      |
| MARIA         | VILLANI          | GENERAL PRACTITIONER, GENOVA             |
| RICCARDO      | VINCI            | GENERAL PRACTITIONER, CALTANISSETTA      |
| ROBERTA       | VIOLA            | NEUROLOGIST, CIAMPINO                    |
| SILVIO        | VITALE           | GENERAL PRACTITIONER, TRAPANI            |

|             |           |                                     |
|-------------|-----------|-------------------------------------|
| ANGELA      | VITERITTI | GENERAL PRACTITIONER, COSENZA       |
| ALESSANDRA  | VIVO      | GENERAL PRACTITIONER, ROME          |
| VINCENZO    | VIVONA    | GENERAL PRACTITIONER, CAMPANIA      |
| HELEANNA    | VIZZINO   | PNEUMOLOGIST, BARI                  |
| CLAUDIA     | VOLPE     | GENERAL PRACTITIONER, BRESCIA       |
| LAURA       | VOLPI     | GENERAL PRACTITIONER, VITERBO       |
| ANNA MARIA  | VULPIANI  | GENERAL PRACTITIONER, ROME          |
| ROBERTO     | ZAMBELLI  | GENERAL PRACTITIONER, REGGIO EMILIA |
| NICOLETTA   | ZAMBERLAN | GENERAL PRACTITIONER, REGGIO EMILIA |
| TIZIANA     | ZANARDINI | GENERAL PRACTITIONER, PAVIA         |
| NATALE      | ZANFINI   | GENERAL PRACTITIONER, COSENZA       |
| ROBERTO     | ZANONI    | GENERAL PRACTITIONER, REGGIO EMILIA |
| GIUSEPPE    | ZINNA     | GENERAL PRACTITIONER, GENOVA        |
| ANNALISA G. | ZOCCO     | GENERAL PRACTITIONER, MILAN         |
| GIUSEPPE    | ZOCCOLI   | GENERAL PRACTITIONER, REGGIO EMILIA |
| ALESSANDRO  | ZOTTI     | GENERAL PRACTITIONER, CAMPANIA      |
| EMANUELA    | ZURRU     | GENERAL PRACTITIONER, GENOVA        |
